# Supplementary material for: DFT study of gas-phase adsorption of benzotriazole on Cu(111), Cu(100), Cu(110), and low coordinated defects thereon
Source: Royal Society of Chemistry journal article supplement (doi:10.1039/c1cp21873e), 2011-01-01
Supplement: c1cp21873e.pdf [file c1cp21873e.pdf]

# DFT study of gas-phase adsorption of benzotriazole on Cu(111), Cu(100), Cu(110), and low coordinated defects thereon

Sebastijan Peljhan<sup>a</sup> and Anton Kokalj<sup>\*a</sup>

## Supplementary Information

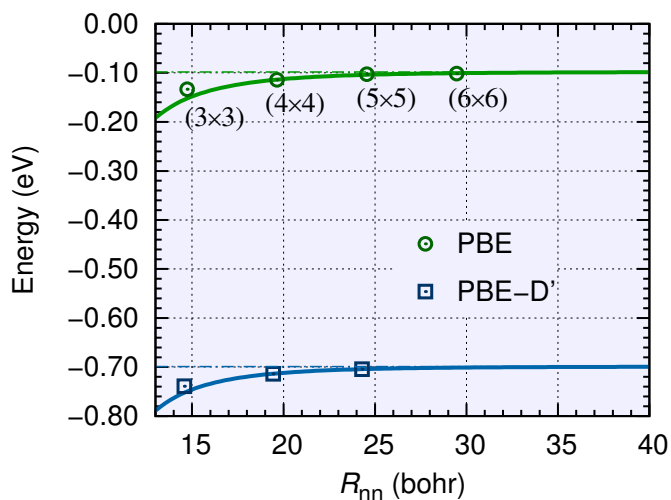

**Fig. S1** The PBE and PBE-D<sup>3</sup> calculated physisorption energies of BTAH on Cu(111) as a function of  $R_{nn}$ . Thin dash-dotted horizontal lines indicate the corresponding extrapolated zero-coverage ( $R_{nn} = \infty$ ) values.

<sup>a</sup> Jožef Stefan Institute, Jamova 39, SI-1000 Ljubljana, Slovenia. Fax: +386-1-477-3822; Tel: +386-1-477-2523; E-mail: tone.kokalj@ijs.si
